# Supplementary material for: Comparative Analysis of Plasmids in the Genus Listeria
Source: PLoS One. 2010 Sep 2;5(9):e12511. doi: 10.1371/journal.pone.0012511 (PMC2932693; doi:10.1371/journal.pone.0012511)
Supplement: Table S2 — Using BlastN with a cutoff of 60% identity and 80% coverage four sRNAs of Listeria monocytogenes EGD-e [55] could be identified on various plasmids. (0.02 MB XLS) [file pone.0012511.s002.xls]

## Sheet: Table_S2
Table S2. Small non-coding RNA found on Listeria plasmids.
sRNA	Plasmid	Identity [%]	Coverage [%]	Start	Stop	Strand
rli28	pLI100	75.66	100	3676	3859	+
rli28	pLMJ0161	75.66	100	44274	44457	-
rli28	pCT100	74.19	98	24725	24903	+
rli28	pLM80	75.66	100	44296	44479	-
rli50	pLI100	75.9	93	3698	3859	-
rli50	pLMJ0161	75.9	93	44274	44435	+
rli50	pCT100	75.9	93	24742	24903	-
rli50	pLM80	75.9	93	44296	44457	+
rli44	pF2-515	80.55	101	22164	22451	-
rli44	pJ1-194	80.82	101	39984	40270	-
rli44	pR2-503	80.55	101	39009	39296	-
rli44	pLM33	80.76	100	14792	15077	-
rli44	pLM1-2bUG1	80.76	100	40266	40551	-
rli44	pLM1-2cUG1	80.76	100	32586	32871	-
rli44	pN1-017	80.48	101	38536	38822	-
rli44	pLM7UG1	80.76	100	32586	32871	-
rli46	pLGUG1	83.66	104	51975	52277	-
rli46	pF2-515	70.03	104	22164	22453	-
rli46	pJ1-194	69.61	104	39984	40272	-
rli46	pR2-503	69.38	104	39009	39298	-
rli46	pLM33	69.84	103	14792	15079	-
rli46	pLM1-2bUG1	69.84	103	40266	40553	-
rli46	pLM1-2cUG1	69.84	103	32586	32873	-
rli46	pN1-017	69.93	104	38536	38824	-
rli46	pLM7UG1	69.84	103	32586	32873	-
